# Supplementary material for: Follistatin-like 1 protects mesenchymal stem cells from hypoxic damage and enhances their therapeutic efficacy in a mouse myocardial infarction model
Source: PubMed Central journal article supplement (PMC6330478; doi:10.1186/s13287-018-1111-y), 2019-01-11
Supplement: 13287_2018_1111_MOESM1_ESM.pdf [file 13287_2018_1111_MOESM1_ESM.pdf]

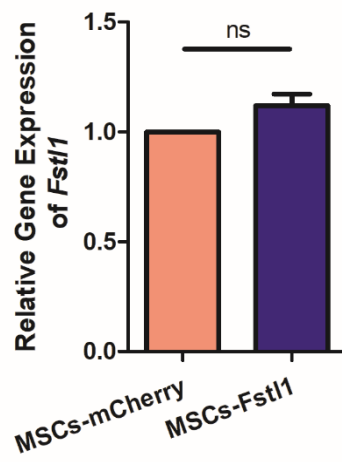

Additional file 1: Fig. S1. Murine heart tissue at the injection site was collected 1 d after myocardial delivery of indicated MSCs and expression of *Fstl1* was determined by qRT-PCR ( $n = 4$ ). ns not significant (TIF 61.8 kb).
