# Supplementary material for: Follistatin-like 1 protects mesenchymal stem cells from hypoxic damage and enhances their therapeutic efficacy in a mouse myocardial infarction model
Source: PubMed Central journal article supplement (PMC6330478; doi:10.1186/s13287-018-1111-y), 2019-01-11
Supplement: 13287_2018_1111_MOESM2_ESM.pdf [file 13287_2018_1111_MOESM2_ESM.pdf]

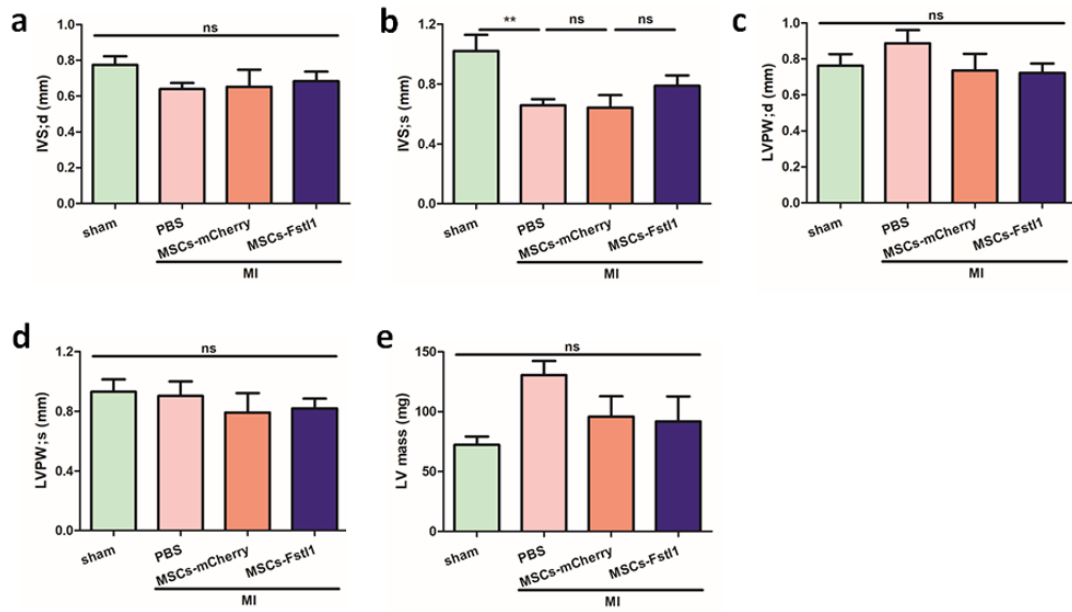

Additional file 2: Fig. S2. Echocardiographic parameters regarding wall thickness and LV mass of post-MI hearts. IVS;d (a), IVS;s (b), LVPW;d (c), LVPW;s (d), and LV mass (e) were analyzed on post-therapy 7d respectively ( $n = 7 - 10$ ).  $**P < 0.01$ . IVS;d interventricular septum in diastole, IVS;s interventricular septum in systole, LVPW;d left ventricular posterior wall in diastole, LVPW;s left ventricular posterior wall in systole, LV mass left ventricular mass, ns not significant (TIF 208 kb).
