# Supplementary material for: Follistatin-like 1 protects mesenchymal stem cells from hypoxic damage and enhances their therapeutic efficacy in a mouse myocardial infarction model
Source: PubMed Central journal article supplement (PMC6330478; doi:10.1186/s13287-018-1111-y), 2019-01-11
Supplement: 13287_2018_1111_MOESM3_ESM.pdf [file 13287_2018_1111_MOESM3_ESM.pdf]

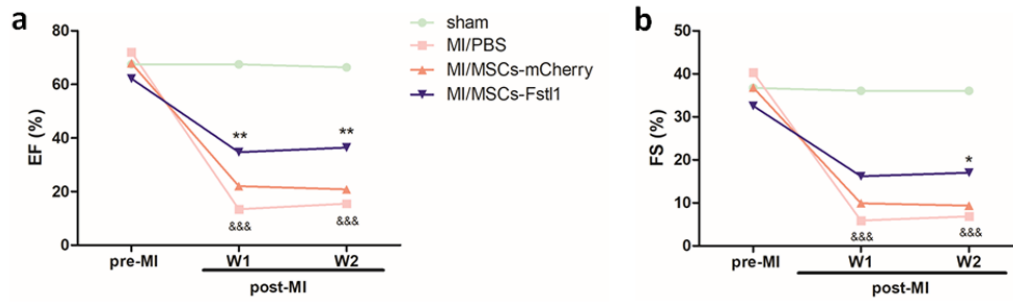

Additional file 3: Fig. S3. Changing tendency of post-MI EF (**a**) and FS (**b**) on indicated timepoints were determined ( $n = 6 - 7$ ) \*MI/MSCs-Fstl1 vs MI/MSCs-mCherry,  $P < 0.05$ ; \*\*MI/MSCs-Fstl1 vs MI/MSCs-mCherry,  $P < 0.01$ ; &&&MI/PBS vs sham,  $P < 0.001$  (TIF 111 kb).
