# Supplementary material for: Follistatin-like 1 protects mesenchymal stem cells from hypoxic damage and enhances their therapeutic efficacy in a mouse myocardial infarction model
Source: PubMed Central journal article supplement (PMC6330478; doi:10.1186/s13287-018-1111-y), 2019-01-11
Supplement: 13287_2018_1111_MOESM4_ESM.pdf [file 13287_2018_1111_MOESM4_ESM.pdf]

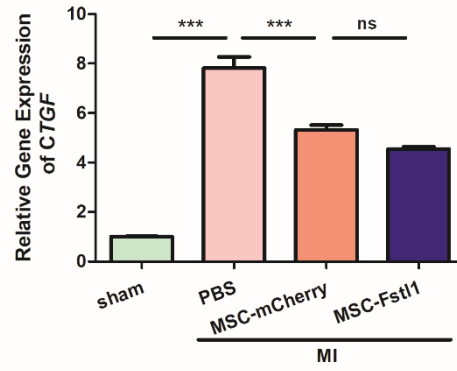

Additional file 4: Fig. S4. qRT-PCR analysis of *CTGF* in peri-infarct myocardium on post-therapy 7d ( $n = 4$ ). \*\*\* $P < 0.001$ . *CTGF* connective tissue growth factor, ns not significant. (TIF 78.3 kb)
