# Supplementary material for: Follistatin-like 1 protects mesenchymal stem cells from hypoxic damage and enhances their therapeutic efficacy in a mouse myocardial infarction model
Source: PubMed Central journal article supplement (PMC6330478; doi:10.1186/s13287-018-1111-y), 2019-01-11
Supplement: 13287_2018_1111_MOESM5_ESM.pdf [file 13287_2018_1111_MOESM5_ESM.pdf]

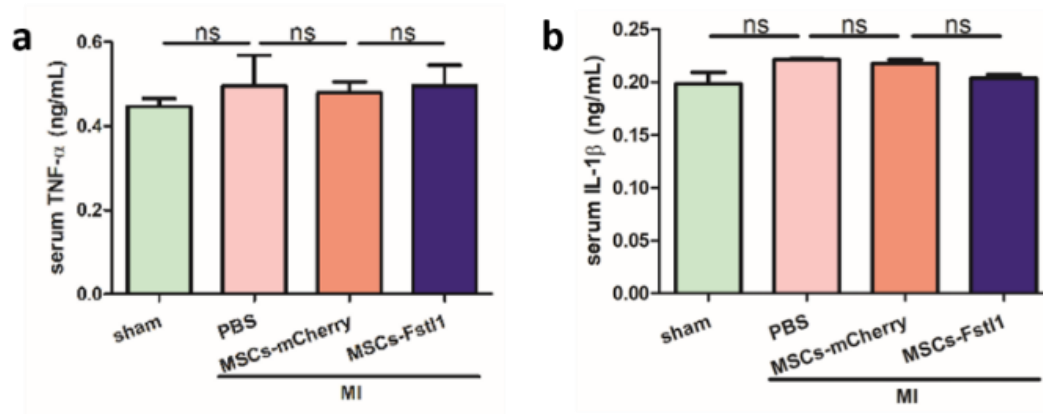

Additional file 5: Fig. S5. Serum TNF- $\alpha$  (a) and IL-1 $\beta$  (b) on post-therapy 7d was determined by ELISA ( $n = 4$ ). TNF- $\alpha$  tumor necrosis factor- $\alpha$ , IL-1 $\beta$  interleukin-1 $\beta$ , ns not significant (TIF 182 kb).
