# Supplementary material for: Follistatin-like 1 protects mesenchymal stem cells from hypoxic damage and enhances their therapeutic efficacy in a mouse myocardial infarction model
Source: PubMed Central journal article supplement (PMC6330478; doi:10.1186/s13287-018-1111-y), 2019-01-11
Supplement: 13287_2018_1111_MOESM6_ESM.pdf [file 13287_2018_1111_MOESM6_ESM.pdf]

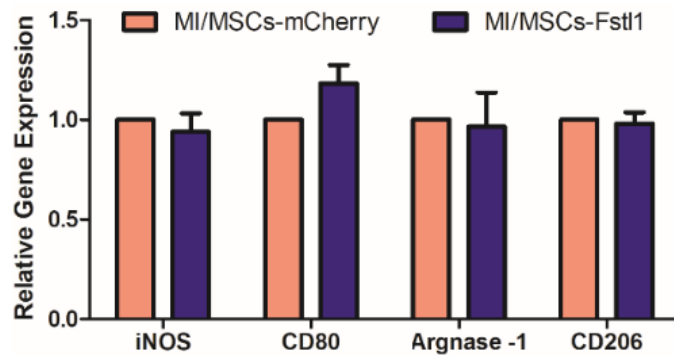

Additional file 6: Fig. S6. qRT-PCR analysis of M1 (*iNOS*, *CD80*) and M2 markers (*Argnase-1*, *CD206*) in peri-infarct myocardium on post-therapy 7d ( $n = 3 - 4$ ). (TIF 92.2 kb)
