# Supplementary material for: Follistatin-like 1 protects mesenchymal stem cells from hypoxic damage and enhances their therapeutic efficacy in a mouse myocardial infarction model
Source: PubMed Central journal article supplement (PMC6330478; doi:10.1186/s13287-018-1111-y), 2019-01-11
Supplement: 13287_2018_1111_MOESM7_ESM.pdf [file 13287_2018_1111_MOESM7_ESM.pdf]

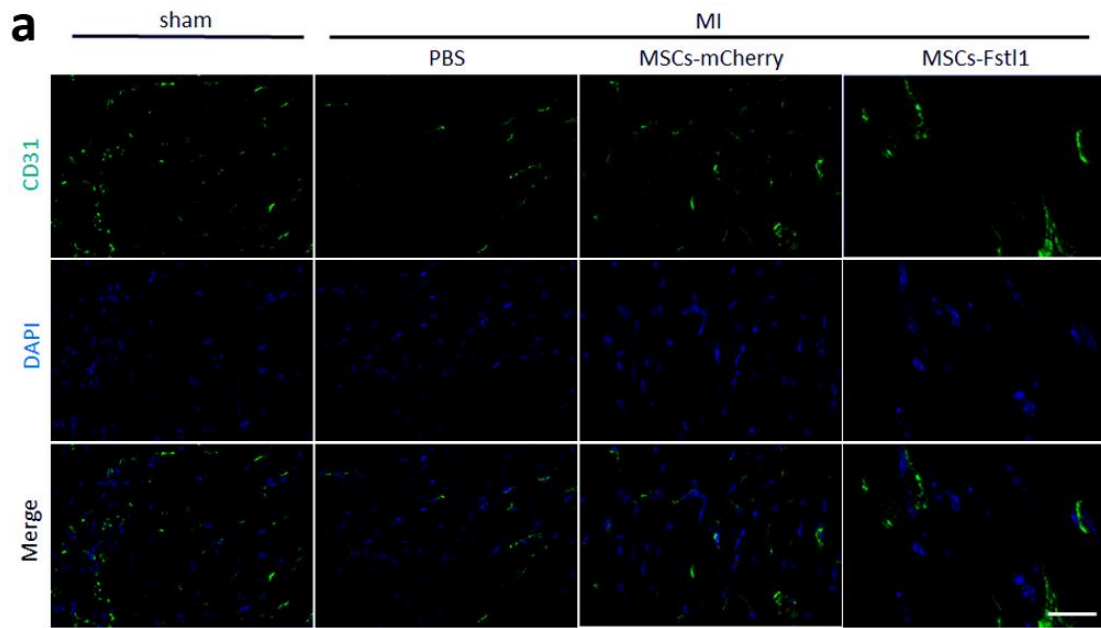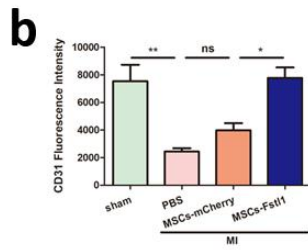

Additional file 7: Fig. S7. Representative images (a) and quantification (b) of CD31 staining within the infarct border zone on post-therapy 7d. Scale bar = 50  $\mu$ m. ( $n = 4 - 5$ ). (TIF 182 kb)
