# Supplementary material for: Follistatin-like 1 protects mesenchymal stem cells from hypoxic damage and enhances their therapeutic efficacy in a mouse myocardial infarction model
Source: PubMed Central journal article supplement (PMC6330478; doi:10.1186/s13287-018-1111-y), 2019-01-11
Supplement: 13287_2018_1111_MOESM8_ESM.pdf [file 13287_2018_1111_MOESM8_ESM.pdf]

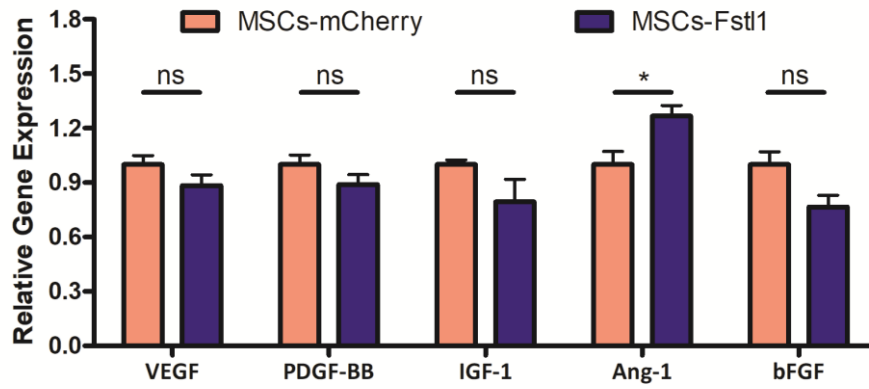

Additional file 8: Fig. S8. qRT-PCR analysis of *VEGF*, *PDGF-BB*, *IGF-1*, *Ang-1*, and *bFGF* in hypoxic MSCs ( $n = 3 - 4$ ).  $**P < 0.01$ . *VEGF* vascular endothelial growth factor, *PDGF-BB* platelet derived growth factor-BB, *IGF-1* Insulin-like growth factor 1, *Ang-1* angiopoietin-1, *bFGF* basic fibroblast growth factor, ns not significant. (TIF 97.7 kb)
